# Supplementary material for: Vibrational mode analysis of hydrogen-bonded organic frameworks (HOFs): synchrotron infrared studies
Source: Royal Society of Chemistry journal article supplement (doi:10.1039/d2cp00796g), 2022-01-01
Supplement: d2cp00796g1.pdf [file d2cp00796g1.pdf]

## *Supporting Information for*

# Vibrational Mode Analysis of Hydrogen-Bonded Organic Frameworks (HOFs): Synchrotron Infrared Studies.

*Courtney Ennis<sup>a, b\*</sup>, Dominique R. T. Appadoo,<sup>c</sup> Stephanie A. Boer,<sup>d</sup> and Nicholas G. White<sup>d</sup>*

- a. Department of Chemistry, University of Otago, Dunedin 9054, New Zealand.
- b. The MacDiarmid Institute for Advanced Materials and Nanotechnology, New Zealand.
- c. ANSTO Australian Synchrotron, 800 Blackburn Road, Clayton, Victoria, 3148, Australia.
- d. Research School of Chemistry, The Australian National University, Canberra ACT 2600, Australia.
- \* Email: [courtney.ennis@otago.ac.nz](mailto:courtney.ennis@otago.ac.nz). Telephone: +64 03 479 5288

|                                      |   |
|--------------------------------------|---|
| Additional DFT images                | 2 |
| Characterization data for <b>3</b>   | 5 |
| Single crystal X-ray crystallography | 7 |

## Additional DFT images:

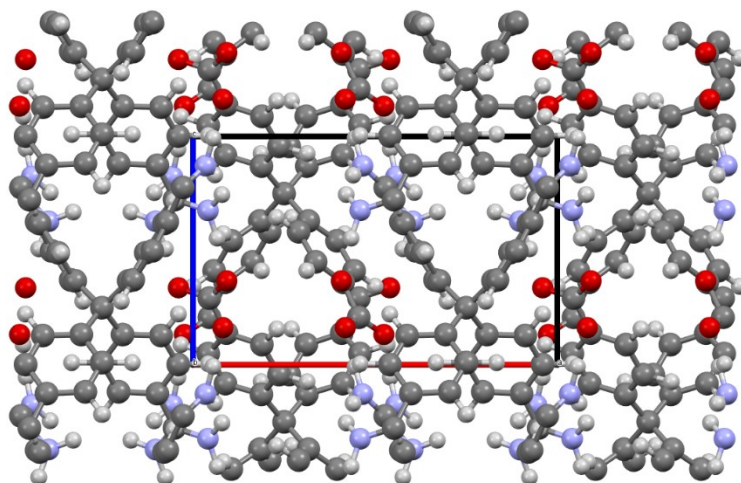

**Figure S1:** p-DFT optimized 2x2x2 supercell of **2** viewing down the crystallographic b-axis.

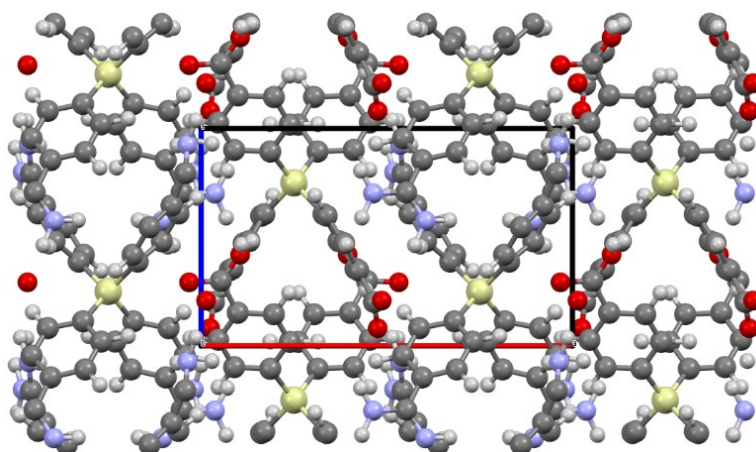

**Figure S2:** p-DFT optimized 2x2x2 supercell of **3** viewing down the crystallographic b-axis.

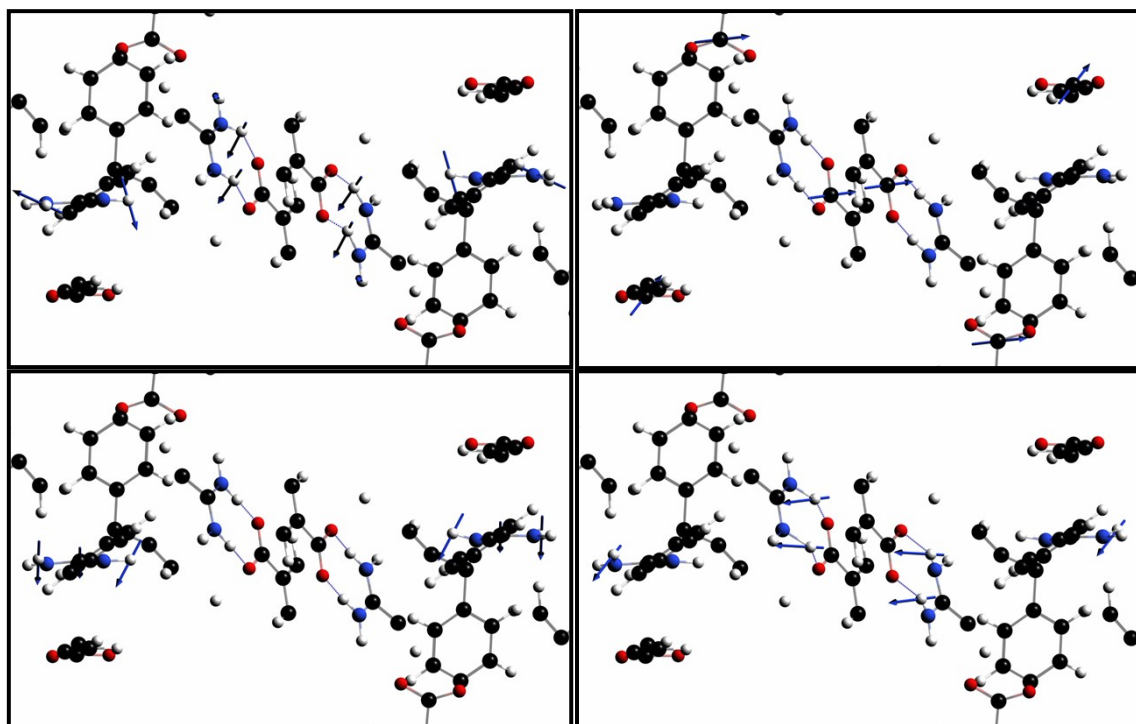

**Figure S3:** p-DFT eigenvectors (B3LYP-D3/6-311G(d)) for the 4:2 tetraamidinium:terephthalate (**1**) framework; **a**: 1030, **b**: 1349, **c**: 1691, and **d**: 2410  $\text{cm}^{-1}$  vibrational modes.

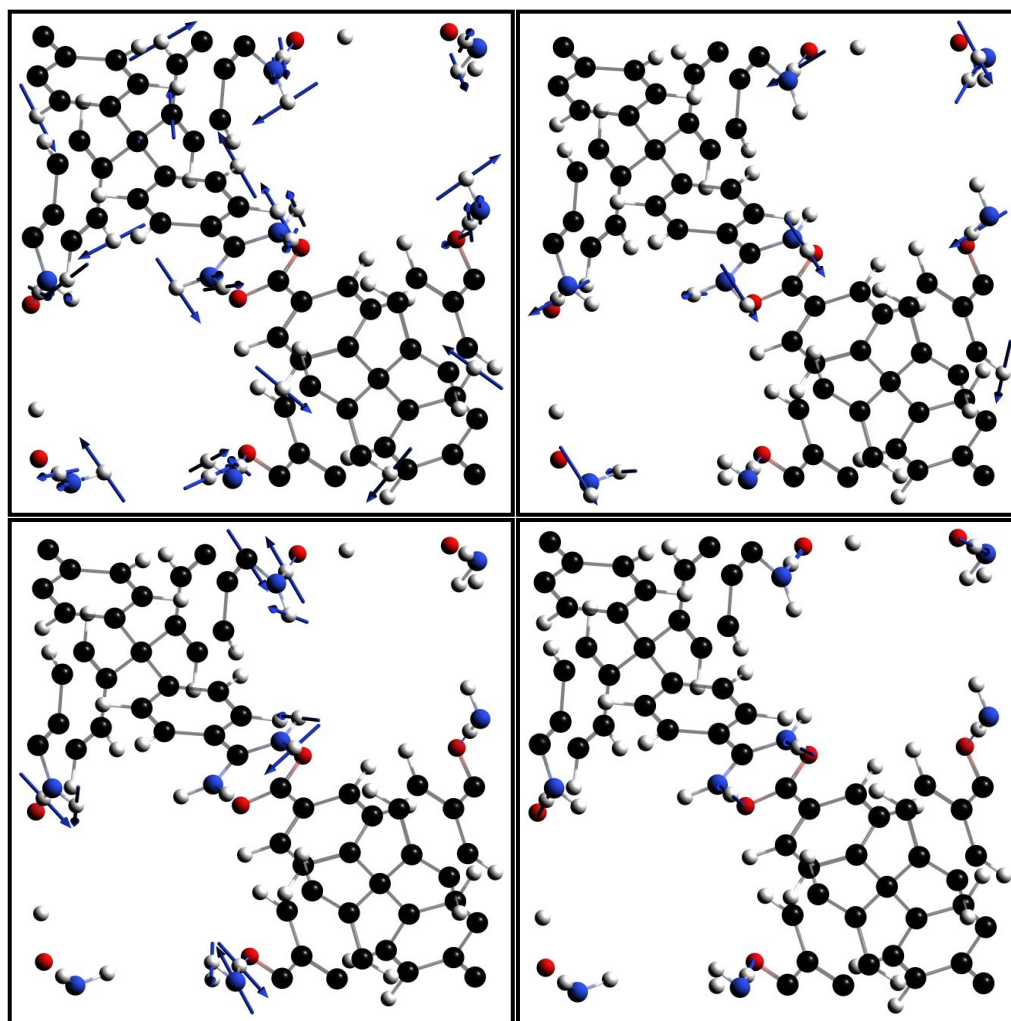

**Figure S4:** p-DFT eigenvectors (B3LYP-D3/6-311G(d)) for the 4:4 tetraamidinium:tetracarboxy (**2**) framework; **a**: 489, **b**: 1147, **c**: 1682, and **d**: 2479  $\text{cm}^{-1}$  vibrational modes.

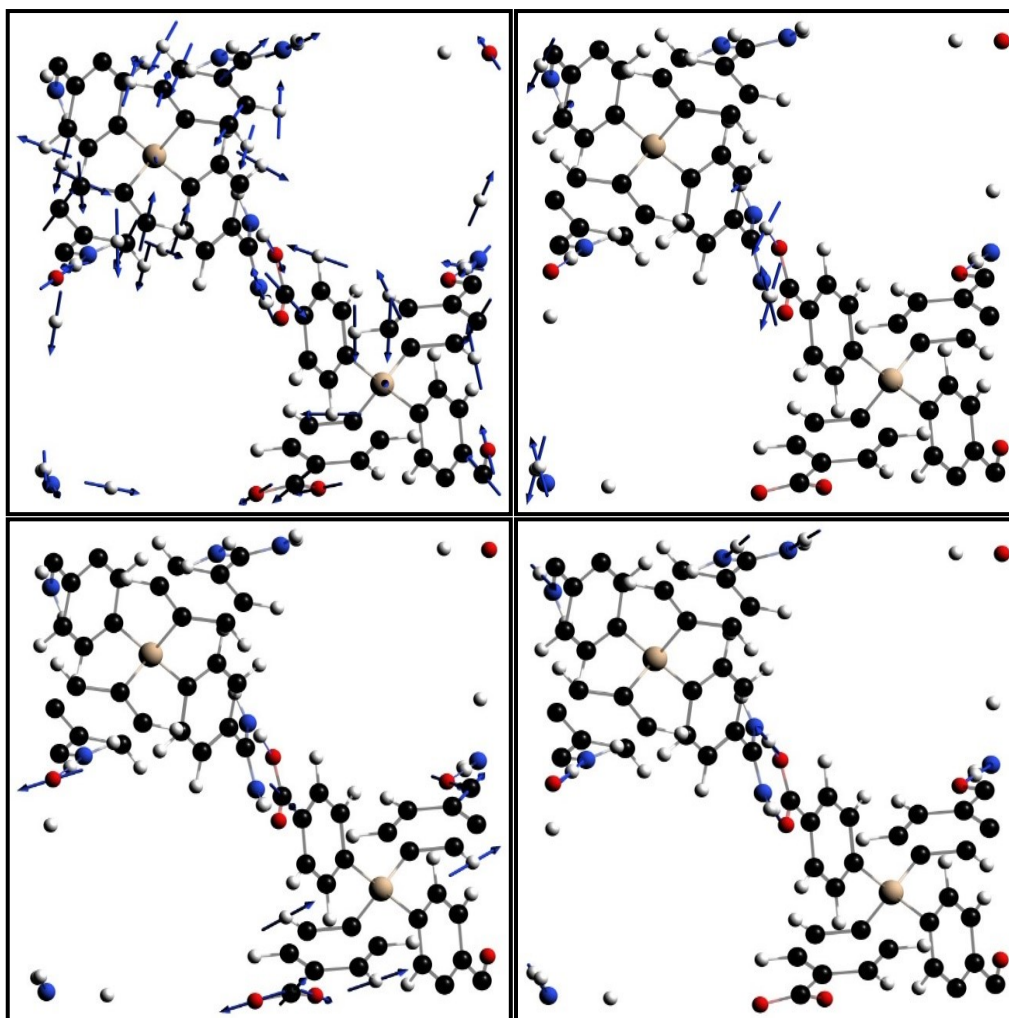

**Figure S5:** p-DFT eigenvectors (B3LYP-D3/6-311G(d)) for the 4:4 tetra(Si)amidinium: tetra(Si)carboxy (**3**) framework; **a:** 385, **b:** 1147, **c:** 1353, and **d:** 2507  $\text{cm}^{-1}$  vibrational modes.

### Characterization data for **3**:

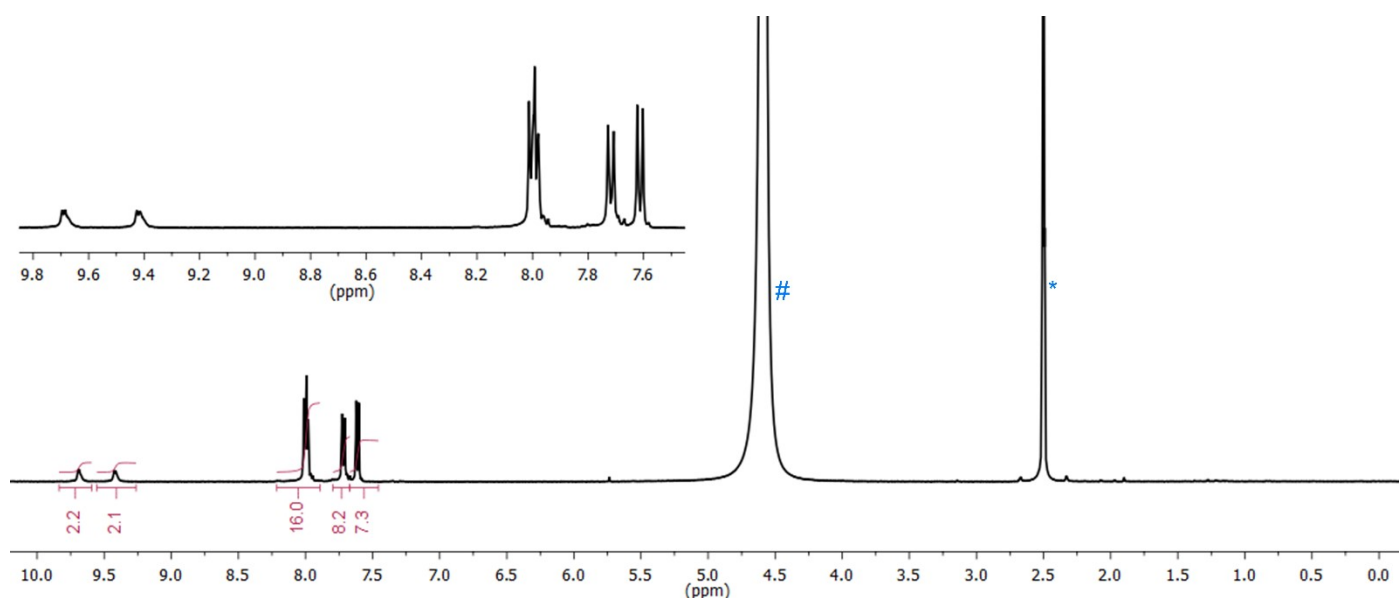

**Figure S6.**  $^1\text{H}$  NMR spectrum of **3**; peak marked # is due to water, peak marked \* is due to the residual NMR solvent. The integration of the amidinium N–H resonances is lower than expected, which we attribute to H/D exchange ( $\text{d}_6$ -DMSO containing a drop of 20% DCl in  $\text{D}_2\text{O}$ , 400 MHz, 298 K).

The TGA trace of **3** is shown in Figure S7. A weight loss of 15% is observed, which corresponds with that expected for the loss of ten water molecules, as indicated by elemental analysis.

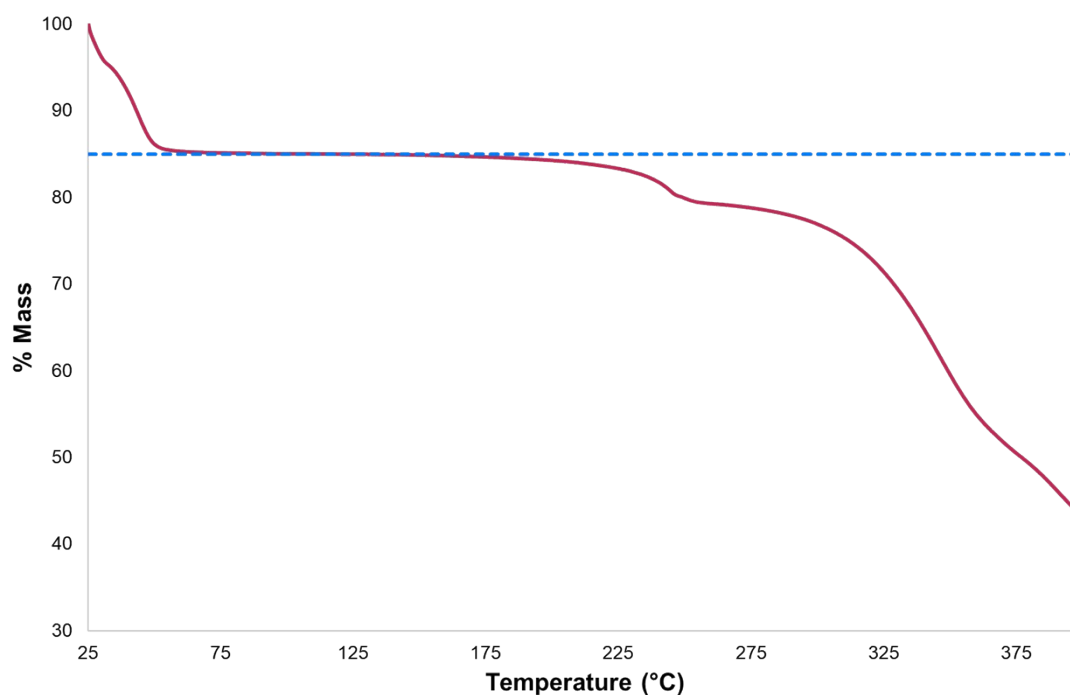

**Figure S7.** TGA trace of **3**, dotted line indicates 84.95 mass %, corresponding to the loss of ten waters to give anhydrous framework (recorded at  $5\text{ }^\circ\text{C min}^{-1}$  under  $\text{N}_2$ ).

The PXRD trace of the air-dried framework (Figure S8) is consistent with that calculated based on the single crystal structure indicating the retention of crystallinity and framework structure upon drying.

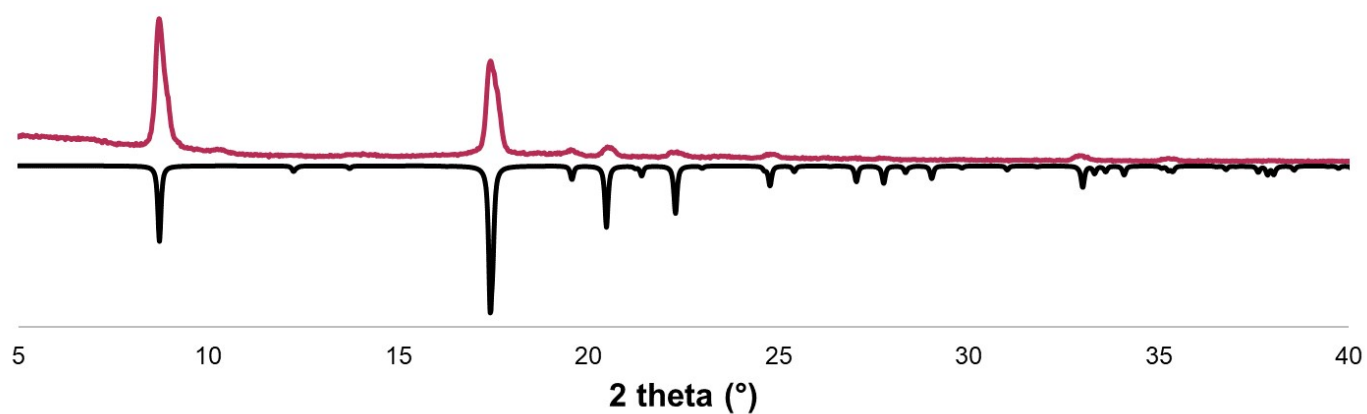

**Figure S8.** PXRD trace of air-dried **3**; observed trace shown pointing upwards (maroon), trace calculated based on single crystal structure shown pointing downwards (black).

## Single crystal x-ray crystallography:

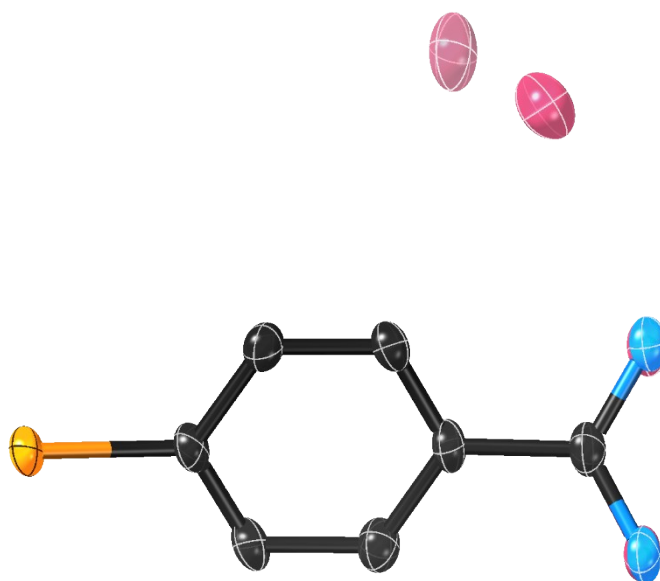

**Figure S9.** Thermal ellipsoid plot showing the asymmetric unit of **3**; ellipsoids are shown at 50% probability, hydrogen atoms are omitted for clarity.

**Table S1.** Crystallographic data for **3**.

|                                                             | <b>3</b>                                                                                                               |
|-------------------------------------------------------------|------------------------------------------------------------------------------------------------------------------------|
| Radiation type                                              | Cu K $\alpha$ ( $\lambda = 1.54184$ Å)                                                                                 |
| Temperature (K)                                             | 150                                                                                                                    |
| Formula                                                     | C <sub>28</sub> H <sub>32</sub> N <sub>8</sub> Si·C <sub>28</sub> H <sub>16</sub> O <sub>8</sub> Si·12H <sub>2</sub> O |
| Formula weight                                              | 1233.40                                                                                                                |
| <i>a</i> (Å)                                                | 14.33058(3)                                                                                                            |
| <i>b</i> (Å)                                                | 14.33058(3)                                                                                                            |
| <i>c</i> (Å)                                                | 8.35856(2)                                                                                                             |
| $\alpha$ (°)                                                | 90                                                                                                                     |
| $\beta$ (°)                                                 | 90                                                                                                                     |
| $\gamma$ (°)                                                | 90                                                                                                                     |
| Unit cell volume (Å <sup>3</sup> )                          | 1716.560(8)                                                                                                            |
| Crystal system                                              | tetragonal                                                                                                             |
| Space group                                                 | <i>P</i> 4 <sub>2</sub> /n                                                                                             |
| <i>Z</i>                                                    | 1                                                                                                                      |
| Reflections (all)                                           | 14784                                                                                                                  |
| Reflections (unique)                                        | 1688                                                                                                                   |
| <i>R</i> <sub>int</sub>                                     | 0.093                                                                                                                  |
| <i>R</i> <sub>1</sub> [ <i>I</i> > 2 $\sigma$ ( <i>I</i> )] | 0.094                                                                                                                  |
| <i>wR</i> <sub>2</sub> (all data)                           | 0.233                                                                                                                  |
| CCDC number                                                 | 2151777                                                                                                                |
